# Supplementary material for: Novel phosphatidylserine-binding molecule enhances antitumor T-cell responses by targeting immunosuppressive exosomes in human tumor microenvironments
Source: PubMed Central journal article supplement — J Immunother Cancer. 2021 Oct 1;9(10):e003148. doi: 10.1136/jitc-2021-003148 (PMC8488709; doi:10.1136/jitc-2021-003148), 2021-10-01
Supplement: jitc-2021-003148supp003.pdf [file jitc-2021-003148supp003.pdf]

**Supplementary Table 1: List of primers used in qRT-PCR**

| Gene          | Direction | Sequence (5'- 3')        |
|---------------|-----------|--------------------------|
| CD4           | Forward   | TGCTAGTGTTCCGATTGACT     |
|               | Reverse   | CATGTCCAGGTGCCACTATC     |
| CD8           | Forward   | CAGTCTTCCTCCCTGTGTATTC   |
|               | Reverse   | CCCTTGTGGTGTACTGTAGATT   |
| EpCAM         | Forward   | CCAGAACAATGATGGGCTTTATG  |
|               | Reverse   | CTCGCTCAGAGCAGGTTATTT    |
| IFN- $\gamma$ | Forward   | GGTCATTCAGATGTAGCGGATAA  |
|               | Reverse   | CTTGATGGTCTCCACACTCTTT   |
| Foxp3         | Forward   | TTCCTCCACAACATGGACTAC    |
|               | Reverse   | TGGTTTCTGAAGAAGGCAAAC    |
| Beta-Actin    | Forward   | TAGTTGCGTTACACCCTTTCTT   |
|               | Reverse   | CGGCCACATTGTGAACTTT      |
| CD86          | Forward   | CTGTAACTCCAGCTCTGCTCCGTA |
|               | Reverse   | GCCATAAGTGTGCTCTGAAGTGA  |
| CD206         | Forward   | GCCCGGAGTCAGATCACACA     |
|               | Reverse   | AGTGGCTCAACCCGATATGACAG  |
